# Supplementary material for: Nurses’ Roles and Responsibilities in Suicide Prevention: A Scoping Review
Source: Research Square preprint supplement (doi:10.21203/rs.3.rs-7206436/v1), 2025-08-04
Supplement: Supplementary file 1 [file 051345d0bf6a59d0f2028f23.pdf]

| No. | Reference                                                                                                                                                                   | Included after Full-Text Screening                                                                                  | Included in Data Extraction and Analysis                                                                  |
|-----|-----------------------------------------------------------------------------------------------------------------------------------------------------------------------------|---------------------------------------------------------------------------------------------------------------------|-----------------------------------------------------------------------------------------------------------|
| 1   | Betz et al., 2019. Counseling Suicidal Patients About Access to Lethal Means: Attitudes of Emergency Nurse Leaders.                                                         | <input type="checkbox"/> yes<br><input checked="" type="checkbox"/> no<br>Reason for Exclusion:<br>wrong concept    | <input type="checkbox"/> yes<br><input checked="" type="checkbox"/> no                                    |
| 2   | Clua-García et al., 2021. Suicide care from the nursing perspective: A meta-synthesis of qualitative studies                                                                | <input checked="" type="checkbox"/> yes<br><input type="checkbox"/> no                                              | <input type="checkbox"/> yes<br><input checked="" type="checkbox"/> no<br>Reason for Exclusion:<br>Review |
| 3   | Collins & Cutcliffe, 2003. Addressing hopelessness in people with suicidal ideation: building upon the therapeutic relationship utilizing a cognitive behavioural approach. | <input type="checkbox"/> yes<br><input checked="" type="checkbox"/> no<br>Reason for Exclusion:<br>wrong concept    | <input type="checkbox"/> yes<br><input checked="" type="checkbox"/> no                                    |
| 4   | Cutcliffe et al., 2007. Reconnecting the person with humanity: how psychiatric nurses work with suicidal people.                                                            | <input type="checkbox"/> yes<br><input checked="" type="checkbox"/> no<br>Reason for Exclusion:<br>wrong population | <input type="checkbox"/> yes<br><input checked="" type="checkbox"/> no                                    |
| 5   | Duffy et al., 2003. Focus. Exploring suicide risk and the therapeutic relationship: a case study approach.                                                                  | <input type="checkbox"/> yes<br><input checked="" type="checkbox"/> no<br>Reason for Exclusion:<br>wrong concept    | <input type="checkbox"/> yes<br><input checked="" type="checkbox"/> no                                    |
| 6   | Garand et al., 2006. SUICIDE IN OLDER ADULTS: NURSING ASSESSMENT OF SUICIDE RISK                                                                                            | <input checked="" type="checkbox"/> yes<br><input type="checkbox"/> no                                              | <input type="checkbox"/> yes<br><input checked="" type="checkbox"/> no<br>Reason for Exclusion:<br>Review |
| 7   | Karlsson et al., 2021. Capturing the Unsaid: Nurses' Experiences of Identifying Mental Ill-Health in Older Men in Primary Care—A Qualitative Study of Narratives.           | <input type="checkbox"/> yes<br><input checked="" type="checkbox"/> no<br>Reason for Exclusion:<br>wrong concept    | <input type="checkbox"/> yes<br><input checked="" type="checkbox"/> no Reason:                            |
| 8   | Repper, 1999. A review of the literature on the prevention of suicide through interventions in Accident and Emergency Departments                                           | <input checked="" type="checkbox"/> yes<br><input type="checkbox"/> no Reason:                                      | <input type="checkbox"/> yes<br><input checked="" type="checkbox"/> no<br>Reason for Exclusion:<br>Review |
| 9   | Poreddi et al., 2021. Attitudes of under graduate nursing students to suicide and their role in caring of persons with suicidal behaviors.                                  | <input type="checkbox"/> yes<br><input checked="" type="checkbox"/> no<br>Reason for Exclusion:<br>wrong concept    | <input type="checkbox"/> yes<br><input checked="" type="checkbox"/> no Reason:                            |
| 10  | Shin et al., 2021. A poststructural analysis: Current practices for suicide prevention by nurses in the emergency department and areas of improvement                       | <input checked="" type="checkbox"/> yes<br><input type="checkbox"/> no                                              | <input type="checkbox"/> yes<br><input checked="" type="checkbox"/> no<br>Reason for Exclusion:<br>Review |
| 11  | Siau et al., 2019. Malaysian Nurses' Attitudes Toward Suicide and Suicidal Patients: A Multisite Study.                                                                     | <input type="checkbox"/> yes<br><input checked="" type="checkbox"/> no<br>Reason for Exclusion:<br>wrong concept    | <input type="checkbox"/> yes<br><input checked="" type="checkbox"/> no                                    |
| 12  | Sun et al., 2005 Suicide: a literature review and its implications for nursing practice in Taiwan                                                                           | <input checked="" type="checkbox"/> yes<br><input type="checkbox"/> no                                              | <input type="checkbox"/> yes<br><input checked="" type="checkbox"/> no<br>Reason for Exclusion:<br>Review |
| 13  | Sun et al., 2006. Patients and nurses' perceptions of ward environmental factors and support systems in the care of suicidal patients.                                      | <input type="checkbox"/> yes<br><input checked="" type="checkbox"/> no<br>Reason for Exclusion:<br>wrong population | <input type="checkbox"/> yes<br><input checked="" type="checkbox"/> no                                    |

| No. | Reference                                                                                                                              | Included after Full-Text Screening                                                                               | Included in Data Extraction and Analysis                                                               |
|-----|----------------------------------------------------------------------------------------------------------------------------------------|------------------------------------------------------------------------------------------------------------------|--------------------------------------------------------------------------------------------------------|
| 14  | Talseth & Gilje, 2011. Nurses' responses to suicide and suicidal patients: a critical interpretive synthesis*                          | <input checked="" type="checkbox"/> yes<br><input type="checkbox"/> no                                           | <input type="checkbox"/> yes<br><input checked="" type="checkbox"/> no<br>Reason for Exclusion: Review |
| 15  | Troya et al., 2024. Healthcare practitioners' views of self-harm management practices in older adults in Ireland: A qualitative study. | <input type="checkbox"/> yes<br><input checked="" type="checkbox"/> no<br>Reason for Exclusion: wrong population | <input type="checkbox"/> yes<br><input checked="" type="checkbox"/> no                                 |
| 16  | Vedana et al., 2018. The meaning of suicidal behaviour from the perspective of senior nursing undergraduate students.                  | <input type="checkbox"/> yes<br><input checked="" type="checkbox"/> no<br>Reason for Exclusion: wrong concept    | <input type="checkbox"/> yes<br><input checked="" type="checkbox"/> no                                 |
