# Supplementary material for: Nurses’ Roles and Responsibilities in Suicide Prevention: A Scoping Review
Source: Research Square preprint supplement (doi:10.21203/rs.3.rs-7206436/v1), 2025-08-04
Supplement: Supplementary file [file c03d783f2e6af17970431c88.pdf]

| Search component            | MEDLINE via EBSCOhost                                                                                                                                                                                                                                                                                                                                                                                                                                                                                                                                                                                                                                                                                                                                                                                                                                                                                                                                                                                                                                                                                                                                                                                                                                                 | CINAHL via EBSCOhost                                                                                                                                                                                                                                                                                                                                                                                                                                                                                                                                                                                                                                                                                                                                                                                                                                                                                                                                                                                                                                                                                                                                                                                                                                                  | PsycInfo via EBSCOhost                                                                                                                                                                                                                                                                                                                                                                                                                                                                                                                                                                                                                                                                                                                                                                                                                                                                                                                                                                                                                                                                                                                                                                                                                                                                                     |
|-----------------------------|-----------------------------------------------------------------------------------------------------------------------------------------------------------------------------------------------------------------------------------------------------------------------------------------------------------------------------------------------------------------------------------------------------------------------------------------------------------------------------------------------------------------------------------------------------------------------------------------------------------------------------------------------------------------------------------------------------------------------------------------------------------------------------------------------------------------------------------------------------------------------------------------------------------------------------------------------------------------------------------------------------------------------------------------------------------------------------------------------------------------------------------------------------------------------------------------------------------------------------------------------------------------------|-----------------------------------------------------------------------------------------------------------------------------------------------------------------------------------------------------------------------------------------------------------------------------------------------------------------------------------------------------------------------------------------------------------------------------------------------------------------------------------------------------------------------------------------------------------------------------------------------------------------------------------------------------------------------------------------------------------------------------------------------------------------------------------------------------------------------------------------------------------------------------------------------------------------------------------------------------------------------------------------------------------------------------------------------------------------------------------------------------------------------------------------------------------------------------------------------------------------------------------------------------------------------|------------------------------------------------------------------------------------------------------------------------------------------------------------------------------------------------------------------------------------------------------------------------------------------------------------------------------------------------------------------------------------------------------------------------------------------------------------------------------------------------------------------------------------------------------------------------------------------------------------------------------------------------------------------------------------------------------------------------------------------------------------------------------------------------------------------------------------------------------------------------------------------------------------------------------------------------------------------------------------------------------------------------------------------------------------------------------------------------------------------------------------------------------------------------------------------------------------------------------------------------------------------------------------------------------------|
| Population/<br>Participants | ( TI nurs* OR AB nurs* OR MH Nurses OR MH Nursing )                                                                                                                                                                                                                                                                                                                                                                                                                                                                                                                                                                                                                                                                                                                                                                                                                                                                                                                                                                                                                                                                                                                                                                                                                   | ( TI nurs* OR AB nurs* OR MH Nurses )                                                                                                                                                                                                                                                                                                                                                                                                                                                                                                                                                                                                                                                                                                                                                                                                                                                                                                                                                                                                                                                                                                                                                                                                                                 | ( TI nurs* OR AB nurs* OR DE Nurses OR DE Nursing )                                                                                                                                                                                                                                                                                                                                                                                                                                                                                                                                                                                                                                                                                                                                                                                                                                                                                                                                                                                                                                                                                                                                                                                                                                                        |
|                             | AND                                                                                                                                                                                                                                                                                                                                                                                                                                                                                                                                                                                                                                                                                                                                                                                                                                                                                                                                                                                                                                                                                                                                                                                                                                                                   | AND                                                                                                                                                                                                                                                                                                                                                                                                                                                                                                                                                                                                                                                                                                                                                                                                                                                                                                                                                                                                                                                                                                                                                                                                                                                                   | AND                                                                                                                                                                                                                                                                                                                                                                                                                                                                                                                                                                                                                                                                                                                                                                                                                                                                                                                                                                                                                                                                                                                                                                                                                                                                                                        |
| Concept                     | <p>( TI suicid* OR AB suicid* OR TI "desire to die" OR AB "desire to die" OR TI "wish to die" OR AB "wish to die" OR TI "wish to hasten death" OR AB "wish to hasten death" OR TI "desire for hastened death" OR AB "desire for hastened death" OR TI "medical assistance in dying" OR AB "medical assistance in dying" OR TI "MAiD" OR AB "MAiD" OR TI "medical aid in dying" OR AB "medical aid in dying" OR TI "assisted suicide" OR AB "assisted suicide" OR TI "physician-assisted suicide" OR AB "physician-assisted suicide" OR TI "assisted dying" OR AB "assisted dying" OR TI euthanasia OR AB euthanasia )</p> <p>AND</p> <p>( TI prevent* OR AB prevent* OR TI manag* OR AB manag* OR TI "suicide prevention" OR AB "suicide prevention" OR MH Suicide Prevention )</p> <p>AND</p> <p>( TI role# OR AB role# OR MH Nursing Role OR TI duty OR AB duty OR TI duties OR AB duties OR TI obligation# OR AB obligation# OR TI responsibilit* OR AB responsibilit* OR TI engag* OR AB engag* OR TI collaborat* OR AB collaborat* OR TI relation* OR AB relation* OR MH Nurse-Patient Relations OR TI interaction# OR AB interaction# OR TI connection# OR AB connection# OR TI "working alliance" OR AB "working alliance" OR TI contact# OR AB contact# )</p> | <p>( TI suicid* OR AB suicid* OR TI "desire to die" OR AB "desire to die" OR TI "wish to die" OR AB "wish to die" OR TI "wish to hasten death" OR AB "wish to hasten death" OR TI "desire for hastened death" OR AB "desire for hastened death" OR TI "medical assistance in dying" OR AB "medical assistance in dying" OR TI "MAiD" OR AB "MAiD" OR TI "medical aid in dying" OR AB "medical aid in dying" OR TI "assisted suicide" OR AB "assisted suicide" OR TI "physician-assisted suicide" OR AB "physician-assisted suicide" OR TI "assisted dying" OR AB "assisted dying" OR TI euthanasia OR AB euthanasia )</p> <p>AND</p> <p>( TI prevent* OR AB prevent* OR TI manag* OR AB manag* OR TI "suicide prevention" OR AB "suicide prevention" OR MH Suicide Prevention )</p> <p>AND</p> <p>( TI role# OR AB role# OR MH Nursing Role OR TI duty OR AB duty OR TI duties OR AB duties OR TI obligation# OR AB obligation# OR TI responsibilit* OR AB responsibilit* OR TI engag* OR AB engag* OR TI collaborat* OR AB collaborat* OR TI relation* OR AB relation* OR MH Nurse-Patient Relations OR TI interaction# OR AB interaction# OR TI connection# OR AB connection# OR TI "working alliance" OR AB "working alliance" OR TI contact# OR AB contact# )</p> | <p>( TI suicid* OR AB suicid* OR TI "desire to die" OR AB "desire to die" OR TI "wish to die" OR AB "wish to die" OR TI "wish to hasten death" OR AB "wish to hasten death" OR TI "desire for hastened death" OR AB "desire for hastened death" OR TI "medical assistance in dying" OR AB "medical assistance in dying" OR TI "MAiD" OR AB "MAiD" OR TI "medical aid in dying" OR AB "medical aid in dying" OR TI "assisted suicide" OR AB "assisted suicide" OR TI "physician-assisted suicide" OR AB "physician-assisted suicide" OR TI "assisted dying" OR AB "assisted dying" OR TI euthanasia OR AB euthanasia )</p> <p>AND</p> <p>( TI prevent* OR AB prevent* OR TI manag* OR AB manag* OR TI "suicide prevention" OR AB "suicide prevention" OR DE Suicide Prevention )</p> <p>AND</p> <p>( TI role# OR AB role# OR DE Professional Role OR TI duty OR AB duty OR TI duties OR AB duties OR TI obligation# OR AB obligation# OR TI responsibilit* OR AB responsibilit* OR TI engag* OR AB engag* OR TI collaborat* OR AB collaborat* OR TI relation* OR AB relation* OR DE Interpersonal Relationships OR DE Therapeutic Processes OR TI interaction# OR AB interaction# OR TI connection# OR AB connection# OR TI "working alliance" OR AB "working alliance" OR TI contact# OR AB contact# )</p> |
| Search results              | 564                                                                                                                                                                                                                                                                                                                                                                                                                                                                                                                                                                                                                                                                                                                                                                                                                                                                                                                                                                                                                                                                                                                                                                                                                                                                   | 524                                                                                                                                                                                                                                                                                                                                                                                                                                                                                                                                                                                                                                                                                                                                                                                                                                                                                                                                                                                                                                                                                                                                                                                                                                                                   | 375                                                                                                                                                                                                                                                                                                                                                                                                                                                                                                                                                                                                                                                                                                                                                                                                                                                                                                                                                                                                                                                                                                                                                                                                                                                                                                        |
