# Supplementary material for: Nurses’ Roles and Responsibilities in Suicide Prevention: A Scoping Review
Source: Research Square preprint supplement (doi:10.21203/rs.3.rs-7206436/v1), 2025-08-04
Supplement: Supplementary file [file ce380f9cef03d1df15074757.pdf]

## Data Extraction Guidance

| Entities to Extract     | Description                                                                                                            | Example                           |
|-------------------------|------------------------------------------------------------------------------------------------------------------------|-----------------------------------|
| Reference               | List the authors and the year the evidence source was published.                                                       | [Author/s] et al. [Year]          |
| Country                 | Specify the country where the evidence source was published.                                                           | England                           |
| Type of evidence source | Indicate the type of evidence source. If applicable, state the study design or type of guideline/standard.             | Qualitative Study                 |
| Population/Participants | Specify the population/participants that are included in the evidence source.                                          | N = X Emergency Department Nurses |
| Context                 | Indicate the adult care setting on which the evidence source focuses. If applicable, identify a specific ward or unit. | Hospital, Psychiatric Ward        |
| Concept                 | Summarize key findings related to the review question.                                                                 | - ...<br>- ...                    |
