# Supplementary material for: Nurses’ Roles and Responsibilities in Suicide Prevention: A Scoping Review
Source: Research Square preprint supplement (doi:10.21203/rs.3.rs-7206436/v1), 2025-08-04
Supplement: Supplementary file [file d479dca5ae88e01c719a2aec.pdf]

## Screening guidance

| Objective                    | Aim:                                                                                                                                                                                                                                                                                              | Research question:                                                                                                                                                                                                                               |
|------------------------------|---------------------------------------------------------------------------------------------------------------------------------------------------------------------------------------------------------------------------------------------------------------------------------------------------|--------------------------------------------------------------------------------------------------------------------------------------------------------------------------------------------------------------------------------------------------|
|                              | To identify nurses' roles and responsibilities in suicide prevention across adult care settings within an international context.                                                                                                                                                                  | What are nurses' roles and responsibilities in suicide prevention across adult care settings within an international context?                                                                                                                    |
| Criteria                     | Inclusion                                                                                                                                                                                                                                                                                         | Exclusion                                                                                                                                                                                                                                        |
| Population/<br>Participants  | Perspectives of nurses with varying levels of professional qualification or nurses were actively involved as participants                                                                                                                                                                         | Other healthcare professionals alongside nurses and the data specific to nurses could not be extracted and analyzed separately                                                                                                                   |
| Concept                      | Focus on roles and responsibilities of nurses in suicide prevention, including the specific context of requests for Medical Assistance in Dying (MaID), assisted suicide, or euthanasia                                                                                                           | <p>suicidality among nurses themselves</p> <p>Focus on training or educational needs of nurses related to specific interventions or programs</p> <p>Focus on the testing or evaluation of particular interventions, programs, or instruments</p> |
| Context                      | Focus on adult care settings in an international context                                                                                                                                                                                                                                          | <p>Non-care settings</p> <p>Focus exclusively on suicide prevention among children or adolescents</p>                                                                                                                                            |
| Types of evidence<br>sources | <p>empirical studies – including qualitative, quantitative, mixed-method research, and case reports – published in peer-reviewed journals</p> <p>reviews incorporating peer-reviewed empirical studies</p> <p>guidelines, standards, policy papers, discussion papers, and professional codes</p> | -                                                                                                                                                                                                                                                |
| Language                     | English and German                                                                                                                                                                                                                                                                                | -                                                                                                                                                                                                                                                |
| Publication date             | published in any year                                                                                                                                                                                                                                                                             | -                                                                                                                                                                                                                                                |
